# Supplementary material
Source: Springer Nature journal article supplement (https://www.springermedizin.de/resource/supplementary/12872_2010_335_MOESM2_ESM.pdf/9429724)

## Females

## Males

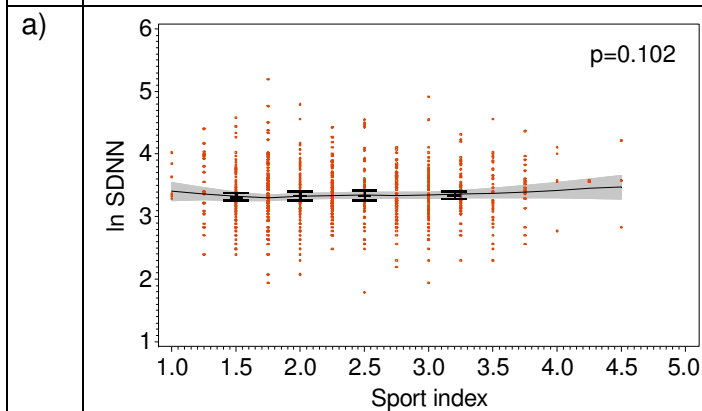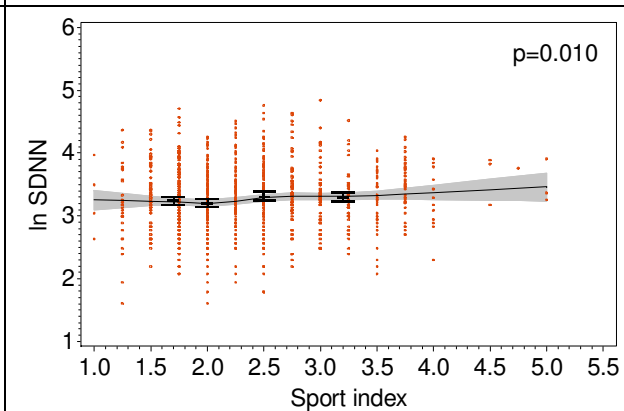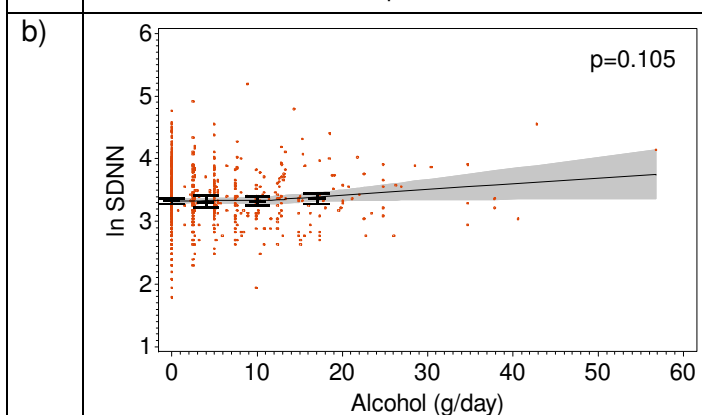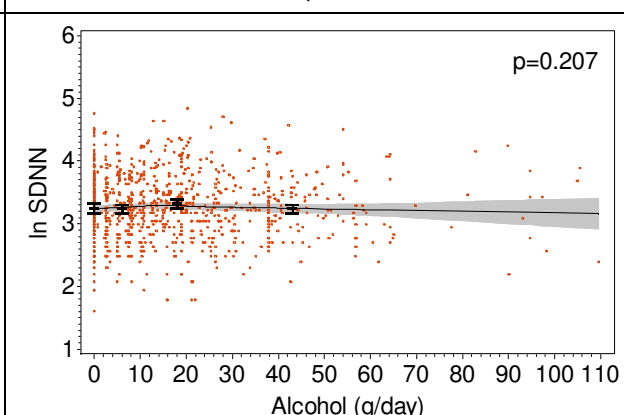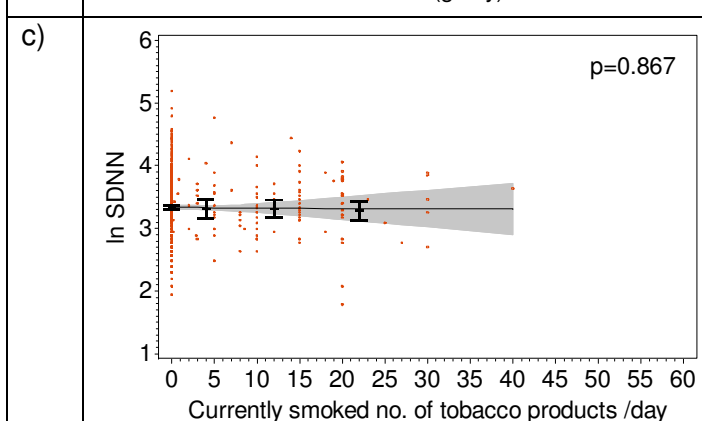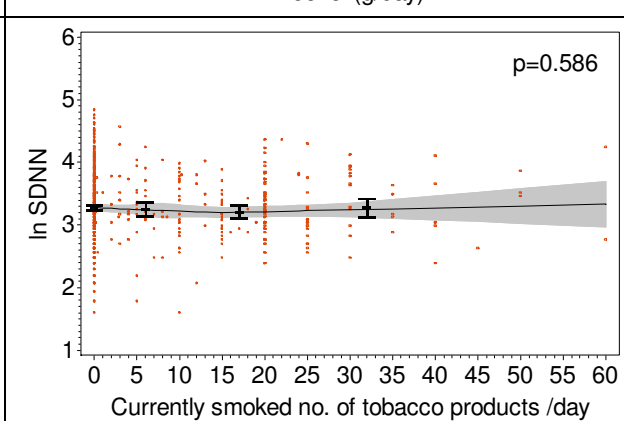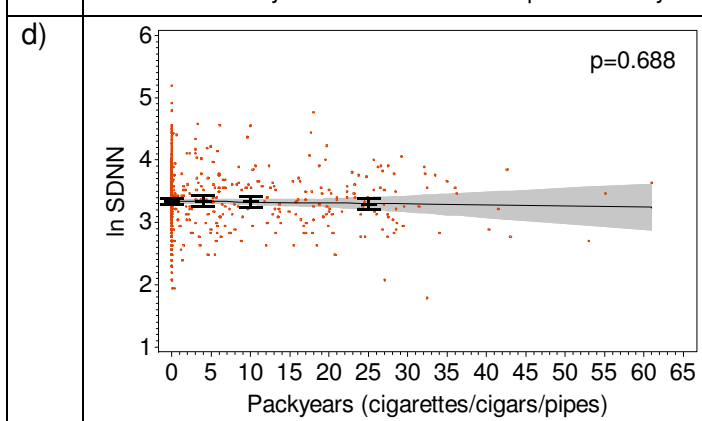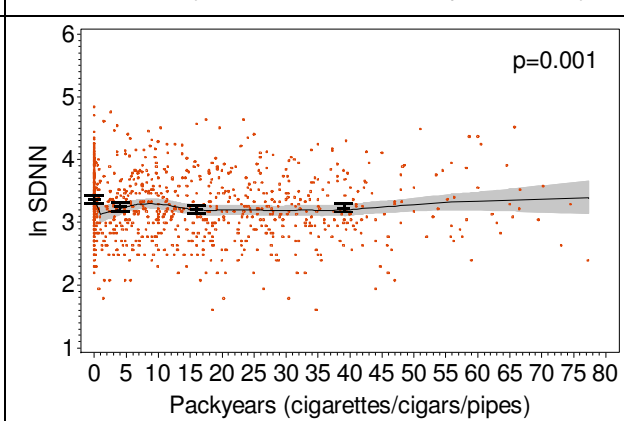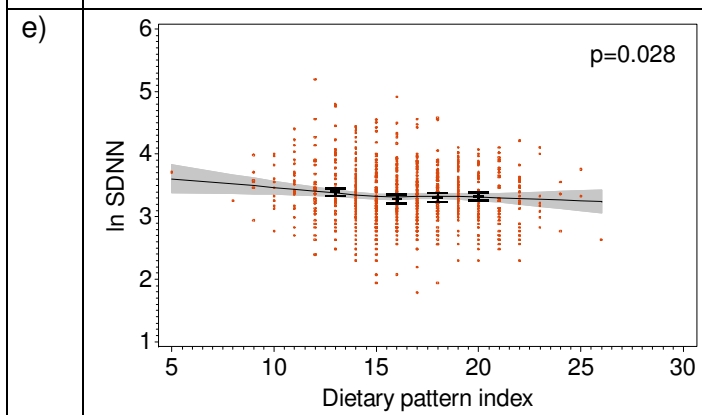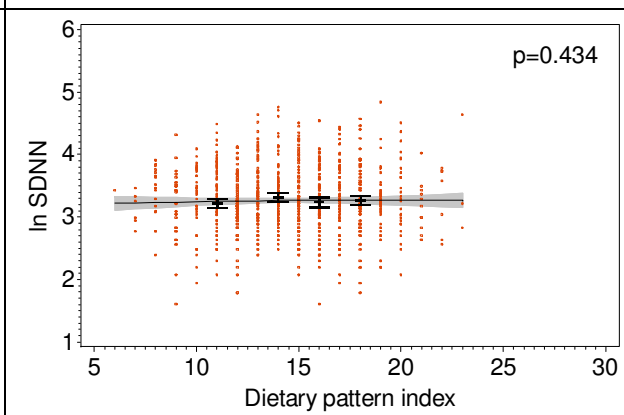

Supplement: MOESM2 [file 9429724]
